# Supplementary material
Source: PubMed Central journal article supplement (PMC3807900)
Supplement: JVI.01388-13_zjv999098298so1.pdf [file JVI.01388-13_zjv999098298so1.pdf]

1 **Antibody Recognition of the Pandemic H1N1 Influenza**

2 **Hemagglutinin Receptor Binding Site**

3

4 Running title: Pandemic H1N1 Recognition by Human Antibody 5J8

5

6 **Supplemental Material**

7 **Sequences of HA proteins used in binding studies.** The sequences listed below represent the  
8 full-length ORF as cloned in the baculovirus transfer vector. Most of the N-terminal signal  
9 peptide (MVLVNQSHQGFNKEHTSKMVSAIVLYVLLAAAAHSAFA) is presumably  
10 removed during secretion, leaving four non-native residues (ADPG) at the N-terminus of HA1.  
11 The C-terminal BirA biotinylation site, thrombin cleavage site, trimerization domain, and His<sub>6</sub>  
12 tag are retained on all proteins.

13  
14 **>A/South Carolina/1/1918 (H1N1)**

15 MVLVNQSHQGFNKEHTSKMVSAIVLYVLLAAAAHSAFAADPGDTICIGYHANNSTDTVDTVLEKNVTVTHSVNLLD  
16 SHNGKLCCLKGIAPLQLGKCNIAGWLLGNPECDLLLTASSWSYIVETSNSENGTCYPGDFIDYEELREQLSSVSSFE  
17 KFEIFPKTSSWPNHETTKGVTAACSYAGASSFYRNLLWLTKKGSSYPKLSKSYVNNKGKEVLVLWGVHHPPTGTDQQ  
18 SLYQNADAYVSVGSSKYNRRFTPEIAARPKVRDQAGRMNYYWTLLEPGDTITFEATGNLIAPWYAFALNRGSGSII  
19 TSDAPVHDCNTKCTPHGAINSSLPFQNIHPVTIGCEPKYVRSTKLRMATGLRNIPSIQSRGLFGAIAAGFIEGGWTG  
20 MIDGWYGYHHQNEQGSYAADQKSTQNAIDGITNKVNSVIEKMNTQFTAVGKEFNLERRIENLNKKVDDGFLDIWT  
21 YNAELLVLLLENERTLDFHDSNVRNLYEKVKSQKNNAKEIGNGCFEFYHKCDDACMESVRNGTYDYPKYSEESKLN  
22 EEIDGVSGGGGLNDIFEAQKIEWHERLVPRGSPGSGYIPEAPRDGQAYVRKDGGEWVLLSTFLGHHHHHH

23  
24 **>A/WSN/1933 (H1N1)**

25 MVLVNQSHQGFNKEHTSKMVSAIVLYVLLAAAAHSAFAADPGDTICIGYHANNSTDTVDTIFEKNVAVTHSVNLLD  
26 RHNGKLCCLKGIAPLQLGKCNIAGWLLGNPECDLLPARSWSYIVETPNSENGACYPGDFIDYEELREQLSSVSSLE  
27 RFEIFPKESSWPNHFTFNGVTVSCHRKSSFYRNLLWLTKKGDSPKLTNSYVNNKGKEVLVLWGVHHPSSSDEQQS  
28 LYSNGNAYVSVASSNRRFTPEIAARPKVKDQHGMRNYYWTLLEPGDTITFEATGNLIAPWYAFALS RGFESGII  
29 SNASMHECNTKCTPQGSINSNLPFQNIHPVTIGCEPKYVRSTKLRMVTGLRNIPSIQYRGLFGAIAAGFIEGGWTGM  
30 IDGWYGYHHQNEQGSYAADQKSTQNAINGITNKVNSVIEKMNTQFTAVGKEFNLEKR MENLNKKVDDGFLDIWTY  
31 NAELLVLLLENERTLDFHDLNVKNLYEKVKSQKNNAKEIGNGCFEFYHKCDNECMESVRNGTYDYPKYSEESKLNRE  
32 KIDGVSGGGGLNDIFEAQKIEWHERLVPRGSPGSGYIPEAPRDGQAYVRKDGGEWVLLSTFLGHHHHHH

33  
34 **>A/Puerto Rico/8/1934 (H1N1)**

35 MVLVNQSHQGFNKEHTSKMVSAIVLYVLLAAAAHSAFAADPGDTICIGYHANNSTDTVDTVLEKNVTVTHSVNLLD  
36 SHNGKLCRLKGIAPLQLGKCNIAGWLLGNPECDPLL PVRWSYIVETPNSENGICYPGDFIDYEELREQLSSVSSFE  
37 RFEIFPKESSWPNHNTNGVTAACSHGKSSFYRNLLWLTEKEGSYPKLNKSYVNNKGKEVLVLWGIHHPNSKEQQN  
38 LYQENAYVSVVTSNRRFTPEIAERP KVRDQAGRMNYYWTLKPGDTITFEANGNLIAPMYAFALS RGFESGII  
39 SNASMHECNTKCTPLGAINSSLPYQNIHPVTIGCEPKYVRS AKLRMVTGLRNIPSIQSRGLFGAIAAGFIEGGWTGM  
40 IDGWYGYHHQNEQGSYAADQKSTQNAINGITNKVNTVIEKMNIQFTAVGKEFNKLEKR MENLNKKVDDGFLDIWTY  
41 NAELLVLLLENERTLDFHDSNVKNLYEKVKSQKNNAKEIGNGCFEFYHKCDNECMESVRNGTYDYPKYSEESKLNRE  
42 KVDGVSGGGGLNDIFEAQKIEWHERLVPRGSPGSGYIPEAPRDGQAYVRKDGGEWVLLSTFLGHHHHHH

43  
44 **>A/AA/Marton/1943 (H1N1)**

45 MVLVNQSHQGFNKEHTSKMVSAIVLYVLLAAAAHSAFAADPGDTICIGYHANNSTDTVDTVLEKNVTVTHSVNLLD  
46 SHNGKLCRLKGIAPLQLGKCNIAGWILGNPECESL LRSWSYIVETPNSENGTCYPGDFIDYEELREQLSSVSSFE  
47 RFEIFSKESSWPKHNTTRGVTAACSHAGKSSFYRNLLWLTEKDGSPN LNNSYVNNKGKEVLVLWGVHHPNSNIKDQ  
48 TLYQKENAYVSVSSNRRFTPEIAERP KVRGQAGRMNYYWTLKPGDTIMFEANGNLIAPWYAFALS RGFESGII  
49 TSNASMHECDTKCTPQGAINSSLPFQNIHPVTIGCEPKYVRSTKLRMVTGLRNIPSIQSRGLFGAIAAGFIEGGWTG  
50 MIDGWYGYHHQNEQGSYAADQKSTQNAINGITNKVNSVIEKMNTQFTAVGKEFNLEKR MENLNKKVDDGFLDIWT  
51 YNAELLVLLLENERTLDFHDSNVKNLYEKVKNQLRNNAKEIGNGCFEFYHKCNNECMESVKNGTYDYPKYSEESKLN  
52 EKIDSGGGGLNDIFEAQKIEWHERLVPRGSPGSGYIPEAPRDGQAYVRKDGGEWVLLSTFLGHHHHHH

53  
54 **>A/duck/Alberta/345/1976 (H1N1)**

55 MVLVNQSHQGFNKEHTSKMVSAIVLYVLLAAAAHSFAADPGDTICVGYHANNSTDTVDTVLEKNVTVTHSVNLLED  
56 SHNGKLCRLKGIAPLQLGKCNVAGWLLGNPECDLLLTANSWSYIIETSNSENGTCYPGEFIDYEELREQLSSISSFE  
57 KFEIFPKASSWPNHETTKGVTAACSYSGASSFYRNLLWITKKGTSYPKLSKSYTNNKGKEVLVLWGVHHPSPVSEQQ  
58 SLYQNADAYVSVGSSKYNRRFAPEIAARPEVRGQAGRMNYWTLLDQGDITTFEATGNLIAPWYAFALNKGSDSGII  
59 TSDAPVHNCDCRQTPHGFALNSSLPFQNVHPITIGECPKYVKSTKLRMATGLRNVPSIQSRGLFGAIAAGFIEGGWTG  
60 MIDGWYGYHHQNEQGSYAADQKSTQNAIDGITNKVNSVIEKMNTQFTAVGKEFNLERRIENLNKKVDDGFLDVT  
61 YNAELLVLLLENERTLDFHDSNVRNLYEKVKSQLRNNAKEIGNGCFEFYHKCDECEMESVKNGTYDYPKYSEESKLN  
62 EEIDSGGGGLNDIFEAQKIEWHERLVPGRSPGSGYIPEAPRDGQAYVRKDGWVLLSTFLGHHHHHH

63  
64 **>A/USSR/90/1977 (H1N1)**

65 MVLVNQSHQGFNKEHTSKMVSAIVLYVLLAAAAHSFAADPGDTICIGYHANNSTDTVDTVLEKNVTVTHSVNLLED  
66 SHNGKLCRLKGIAPLQLGKCNVAGWLLGNPECESLFSKKSWSYIAETPNSENGTCYPGYFADYEELREQLSSVSSFE  
67 RFEIFPKERSWPKHNVTRGVTASCSSHGKSSFYRNLLWLTEKNGSYPNLSKSYVNNKEKEVLVLWGVHHPSPNIEDQK  
68 TIYRKENAYVSVVSSNYNRRFTPEIAERPQVRGQAGRINYYWTLLLEPGDTIIFEANGNLIAPWHAFALNRGFGSGII  
69 TSNASMDECDTKCQTPQGAINSSLPFQNIHPVTIGECPKYVVRSTKLRMVTGLRNIPSIQSRGLFGAIAAGFIEGGWTG  
70 MIDGWYGYHHQNEQGSYAADQKSTQNAINGITNKVNSVIEKMNTQFTAVGKEFNKLEKRMENTLNKKVDDGFLDIWT  
71 YNAELLVLLLENERTLDFHDSNVKNLYEKVKSQKNNNAKEIGNGCFEFYHKCNNECEMESVKNGTYDYPKYSEESKLN  
72 EKIDSGGGGLNDIFEAQKIEWHERLVPGRSPGSGYIPEAPRDGQAYVRKDGWVLLSTFLGHHHHHH

73  
74 **>A/Singapore/6/1986 (H1N1)**

75 MVLVNQSHQGFNKEHTSKMVSAIVLYVLLAAAAHSFAADPGDTICIGYHANNSTDTVDTVLEKNVTVTHSVNLLED  
76 SHNGKLCRLKGIAPLQLGNCIAGWILGNPECESLFSKKSWSYIAETPNSENGTCYPGYFADYEELREQLSSVSSFE  
77 RFEIFPKESSWPNHTVTGVTASCSSHGKRSSFYRNLLWLTKKNGSYPNLSKSYVNNKEKEVLVLWGVHHPSPNIGDQR  
78 AIYHTENAYVSVVSSHYNRRFTPEIAKRPKVRDQEGRINYYWTLLLEPGDTIIFEANGNLIAPWYAFALSRGFGSGII  
79 TSNASMDECDAKCQTPQGAINSSLPFQNVHPVTIGECPKYVVRSTKLRMVTGLRNIPSIQSRGLFGAIAAGFIEGGWTG  
80 MIDGWYGYHHQNEQGSYAADQKSTQNAINGITNKVNSVIEKMNTQFTAVGKEFNKLEKRMENTLNKKVDDGFLDIWT  
81 YNAELLVLLLENERTLDFHDSNVKNLYEKVKSQKNNNAKEIGNGCFEFYHKCNNECEMESVKNGTYDYPKYSEESKLN  
82 EKIDSGGGGLNDIFEAQKIEWHERLVPGRSPGSGYIPEAPRDGQAYVRKDGWVLLSTFLGHHHHHH

83  
84 **>A/Texas/36/1991 (H1N1)**

85 MVLVNQSHQGFNKEHTSKMVSAIVLYVLLAAAAHSFAADPGDTICIGYHANNSTDTVDTVLEKNVTVTHSVNLLED  
86 SHNGKLCRLKGIAPLQLGNCVAGWILGNPKCESLFSKESWSYIAETPNPENGTCPYGYFADYEELREQLSSVSSFE  
87 RFEIFPKESSWPNHTVTGVTASCSSHGKSSFYRNLLWLTEKNGLYPNLSKSYVNNKEKEVLVLWGVHHPSPNIRDQR  
88 AIYHTENAYVSVVSSHYSRRTPEIAKRPKVRDQEGRINYYWTLLLEPGDTIIFEANGNLIAPWYAFALSRGFGSGII  
89 TSNASMDECDAKCQTPQGAINSSLPFQNVHPVTIGECPKYVVRSTKLRMVTGLRNIPSIQSRGLFGAIAAGFIEGGWTG  
90 MIDGWYGYHHQNEQGSYAADQKSTQNAINGITNKVNSVIEKMNTQFTAVGKEFNKLEKRMENTLNKKVDDGFLDIWT  
91 YNAELLVLLLENERTLDFHDSNVKNLYEKVKSQKNNNAKEIGNGCFEFYHKCNNECEMESVKNGTYDYPKYSEESKLN  
92 GKIDSGGGGLNDIFEAQKIEWHERLVPGRSPGSGYIPEAPRDGQAYVRKDGWVLLSTFLGHHHHHH

93  
94 **>A/Beijing/262/1995 (H1N1)**

95 MVLVNQSHQGFNKEHTSKMVSAIVLYVLLAAAAHSFAADPGDTICIGYHANNSTDTVDTVLEKNVTVTHSVNLLED  
96 SHNGKLCRLKGIAPLQLGNCVAGWILGNPECESLISKESWSYIVETPNPENGTCPYGYFADYEELREQLSSVSSFE  
97 RFEIFPKESSWPNHTVTGVTASCSSHGKSSFYRNLLWLTEKNGLYPNLSNSYVNNKEKEVLVLWGVHHPSPNIGVQRA  
98 IYHTENAYVSVVSSHYSRRTPEIAKRPKVRDQEGRINYYWTLLLEPGDTIIFEANGNLIAPWYAFALSRGFGSGIIT  
99 SNAPMNECDAKCQTPQGAINSSLPFQNVHPVTIGECPKYVVRSTKLRMVTGLRNIPSIQSRGLFGAIAAGFIEGGWTGM  
100 MDGWYGYHHQNEQGSYAADQKSTQNAINGITNKVNSVIEKMNTQFTAVGKEFNKLEKRMENTLNKKVDDGFLDIWTY  
101 NAELLVLLLENERTLDFHDSNVKNLYEKVKSQKNNNAKEIGNGCFEFYHKCNNECEMESVKNGTYDYPKYSEESKLNRE  
102 KIDSGGGGLNDIFEAQKIEWHERLVPGRSPGSGYIPEAPRDGQAYVRKDGWVLLSTFLGHHHHHH

103  
104 **>A/New Caledonia/20/1999 (H1N1)**

105 MVLVNQSHQGFNKEHTSKMVSAIVLYVLLAAAAHSFAADPGDTICIGYHANNSTDTVDTVLEKNVTVTHSVNLLED  
106 SHNGKLCRLKGIAPLQLGNCVAGWILGNPECELLISKESWSYIVETPNPENGTCPYGYFADYEELREQLSSVSSFE  
107 RFEIFPKESSWPNHTVTGVSASCSSHGKSSFYRNLLWLTGKNGLYPNLSKSYVNNKEKEVLVLWGVHHPSPNIGNQRA  
108 LYHTENAYVSVVSSHYSRRTPEIAKRPKVRDQEGRINYYWTLLLEPGDTIIFEANGNLIAPWYAFALSRGFGSGIIT  
109 SNAPMNECDAKCQTPQGAINSSLPFQNVHPVTIGECPKYVRSALRMTGLRNIPSIQSRGLFGAIAAGFIEGGWTGM  
110 VDGWYGYHHQNEQGSYAADQKSTQNAINGITNKVNSVIEKMNTQFTAVGKEFNKLEKRMENTLNKKVDDGFLDIWTY  
111 NAELLVLLLENERTLDFHDSNVKNLYEKVKSQKNNNAKEIGNGCFEFYHKCNNECEMESVKNGTYDYPKYSEESKLNRE  
112 KIDSGGGGLNDIFEAQKIEWHERLVPGRSPGSGYIPEAPRDGQAYVRKDGWVLLSTFLGHHHHHH

113  
114 **>A/Solomon Islands/3/2006 (H1N1)**  
115 MVLVNQSHQGFNKEHTSKMVSIAIVLYVLLAAAAHSAFAADPGDTICIGYHANNSTDTVDTVLEKNVTVTHSVNLLLED  
116 SHNGKLCRLKGIAPLQLGNCVAGWILGNPECELLISRESWSYIVEKPNPENGTCYPGHFADYEELREQLSSVSSFE  
117 RFEIFPKESSWPNHTTTGVSASC SHNGESSFYKNLLWLTGKNGLYPNLSKSYANNKEKEVLVLWGVHHPNIGDQRA  
118 LYHKENAYVSVVSSHYSRKFTPEIAKRPKVRDQEGRINYYWTLLEPGDTIIFEANGNLIAPRYAFALSRGFGSGIIN  
119 SNAPMDECDKACQTPQGAINSSLPFQNVHPVTIGECPKYVRSAKLRMVTGLRNIPSIQSRGLFGAIAAGFIEGGWTGM  
120 VDGWYGYHHQNEQSGSYAADQKSTQNAINGITNKVNSVIEKMNTQFTAVGKEFNKLERRMENLNKKVDDGFIDIWY  
121 NAE LLV LLENERTLDFHDSNVKNLYEKVKSQ LKNNAKE I GNGCFEFYHKCNDECMESVKNGTYDYPKYSEESKLNRE  
122 KIDSGGGGLNDIFEAQKIEWHERLVP RGS PGSGYIPEAPRDGQAYVRKDG EWVLLSTFLGHHHHHH  
123  
124 **>A/California/04/2009 HA2 E47G (H1N1)**  
125 MVLVNQSHQGFNKEHTSKMVSIAIVLYVLLAAAAHSAFAADPGDTLCIGYHANNSTDTVDTVLEKNVTVTHSVNLLLED  
126 KHNGKLCRLRGVAPLHLGKCNIAAGWILGNPECESLSTASSWSYIVETPSSDNGTCYPGDFIDYEELREQLSSVSSFE  
127 RFEIFPKTSSWPNHDSNKGVTAAACPHAGAKSFYKNLIWLKKGNSYPKLSKSYINDKGKEVLVLWGIHHPSTSADQQ  
128 SLYQNADTYV FVGSSRYSKFKKPEIAIRPKVRDQEGRMNYYWTLVEPGDKITFEATGNLVVPRYAFAMERNAGSGII  
129 ISDTPVHDCNTTCTPKGAIN TSLPFQNIHPITIGKCPKYVKSTKLRLATGLRNIPSIQSRGLFGAIAAGFIEGGWTG  
130 MVDGWYGYHHQNEQSGSYAADLKSTQNAIDGITNKVNSVIEKMNTQFTAVGKEFNHLEKRIENLNKKVDDGFLDIWT  
131 YNAELLV LLENERTLDYHDSNVKNLYEKVRSQ LKNNAKE I GNGCFEFYHKCDNTCMESVKNGTYDYPKYSEEAKLNR  
132 EEIDSGGGGLNDIFEAQKIEWHERLVP RGS PGSGYIPEAPRDGQAYVRKDG EWVLLSTFLGHHHHHH

133  **$K_d$  determination.** The experimental binding curves for each Fab or IgG for fitting  $k_{on}$  and  $k_{off}$   
134 for  $K_d$  determination are reported below.

135

136

137

138

139 5J8 Fab versus A/South Carolina/1/1918 (H1N1),  $K_d = 57$  nM

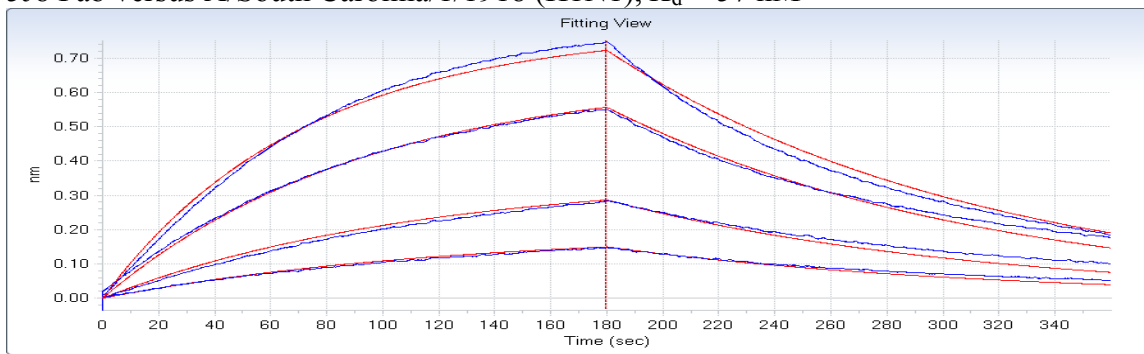

140

141

142 5J8 Fab versus A/USSR/90/1977 (H1N1),  $K_d = 590$  nM

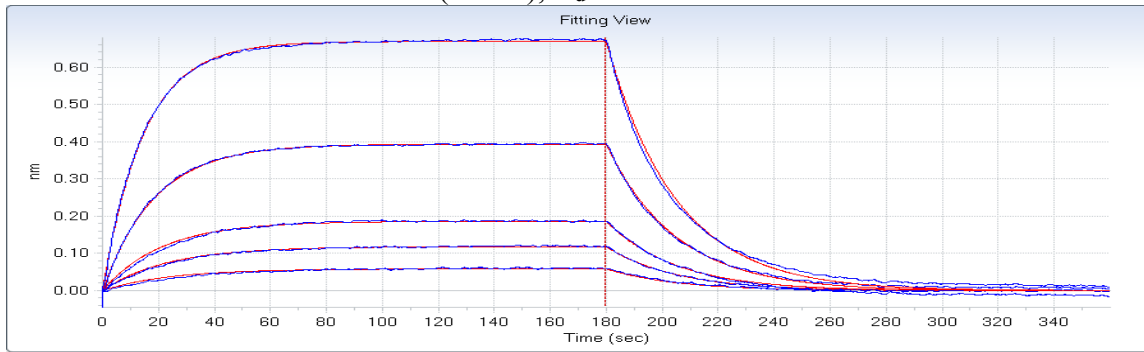

143

144

145 5J8 Fab versus A/Singapore/6/1986 (H1N1),  $K_d = 5.7$  nM

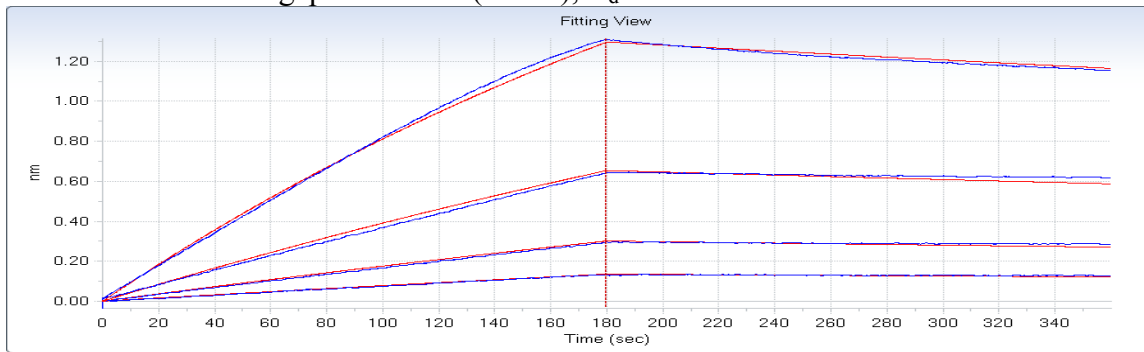

146

147

148 5J8 Fab versus A/Texas/36/1991 (H1N1),  $K_{d1} = 120$  nM,  $K_{d2} = 46$  pM

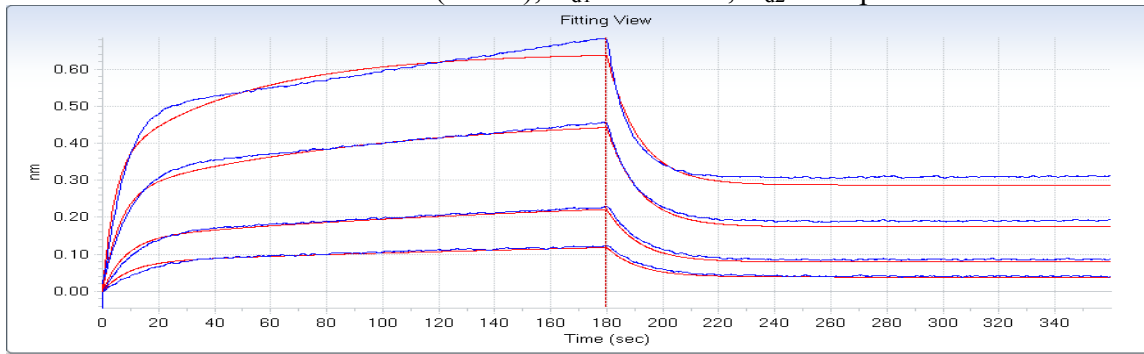

149  
150

151 5J8 Fab versus A/Solomon Islands/3/2006 (H1N1),  $K_{d1} = 930$  nM,  $K_{d2} = 240$  nM

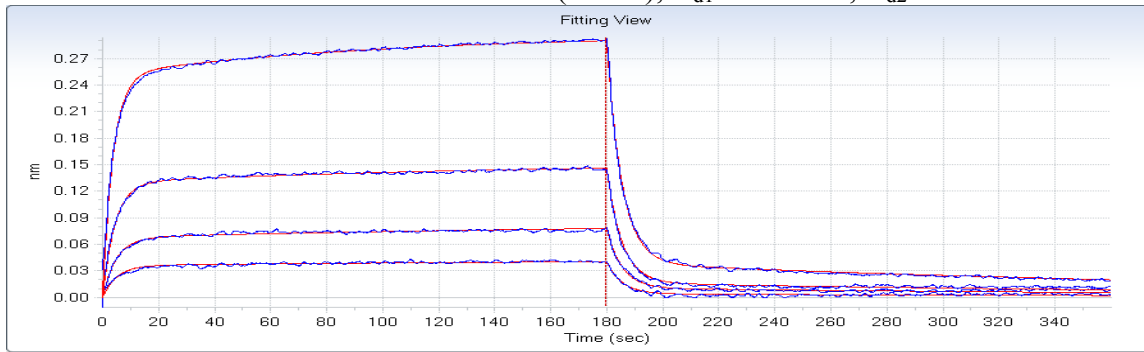

152  
153

154 5J8 Fab versus A/California/04/2009 HA2 E47G (H1N1),  $K_d = 10$  nM

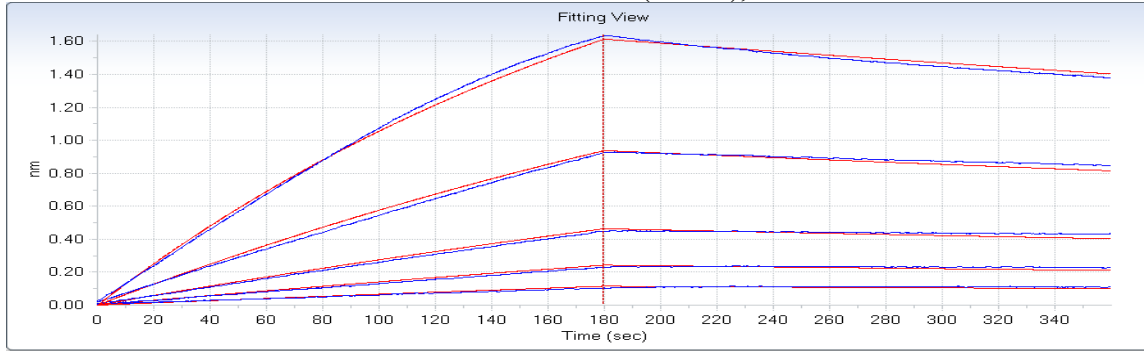

155  
156

157 5J8 IgG versus A/South Carolina/1/1918 (H1N1),  $K_d = 0.30$  nM

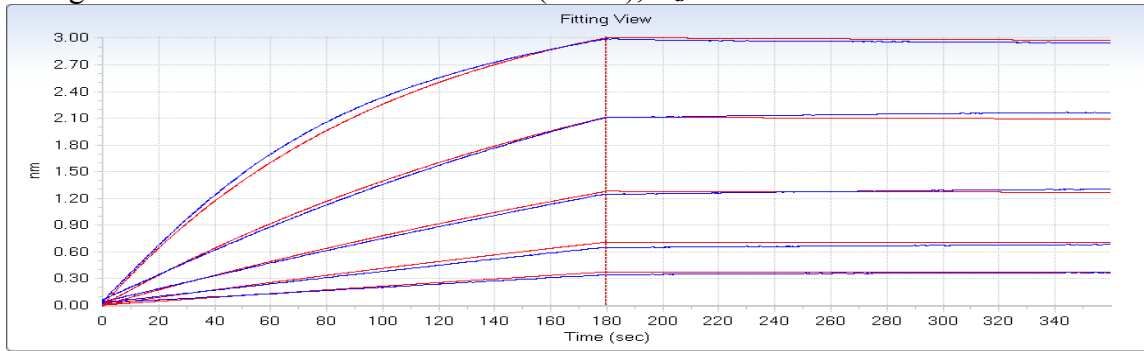

158  
159

160 5J8 IgG versus A/AA/Marton/1943 (H1N1),  $K_{d1} = 950$  nM,  $K_{d2} = 17$  nM

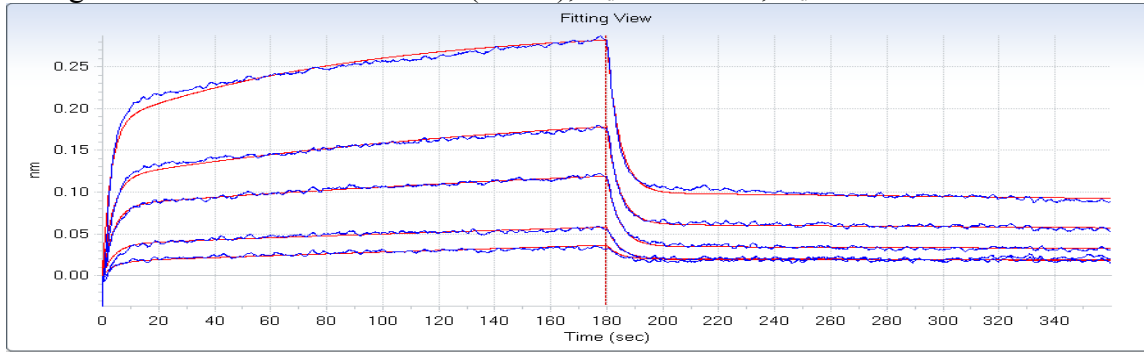

161  
162

163 5J8 IgG versus A/USSR/90/1977 (H1N1),  $K_d = 0.40$  nM

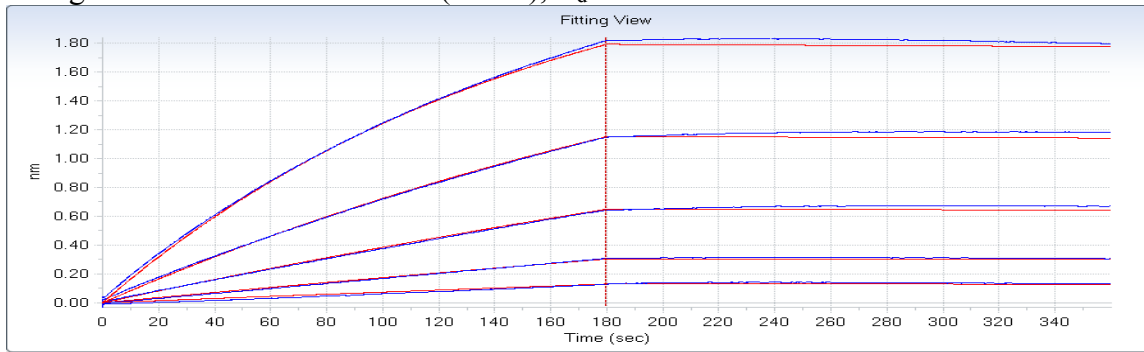

164  
165  
166

5J8 IgG versus A/Singapore/6/1986 (H1N1),  $K_d = 51$  pM

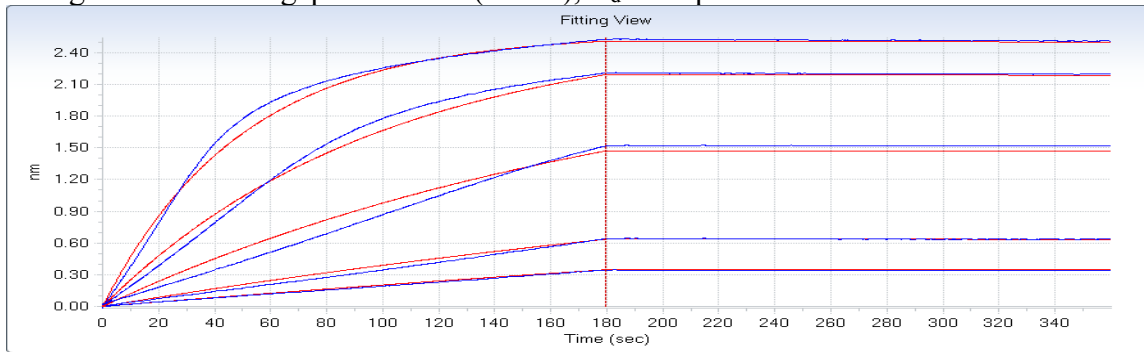

167  
168  
169

5J8 IgG versus A/Texas/36/1991 (H1N1),  $K_d = 1.7$  nM

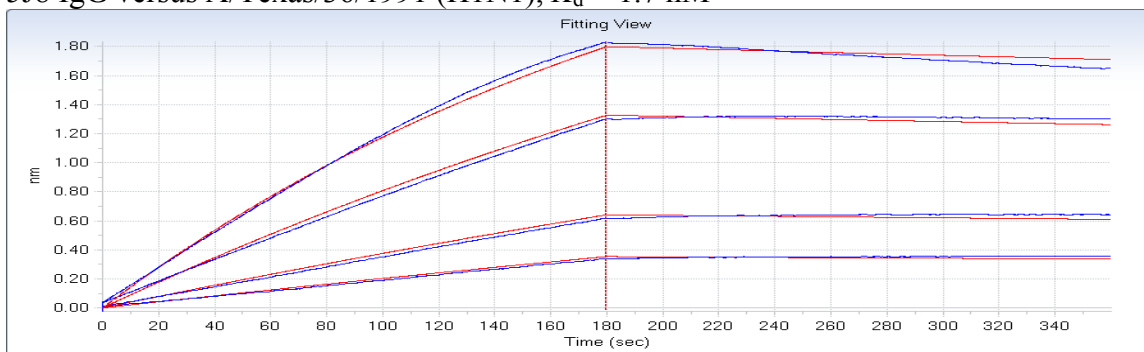

170  
171

172 5J8 IgG versus A/Beijing/262/1995 (H1N1),  $K_{d1} = 1,350$  nM,  $K_{d2} = 400$  nM

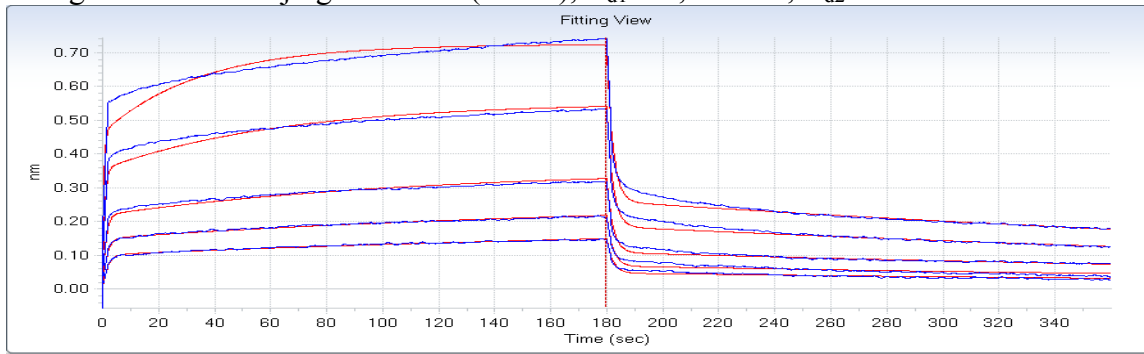

173  
174

175 5J8 IgG versus A/New Caledonia/20/1999 (H1N1),  $K_{d1} = 220$  nM,  $K_{d2} = 63$  nM

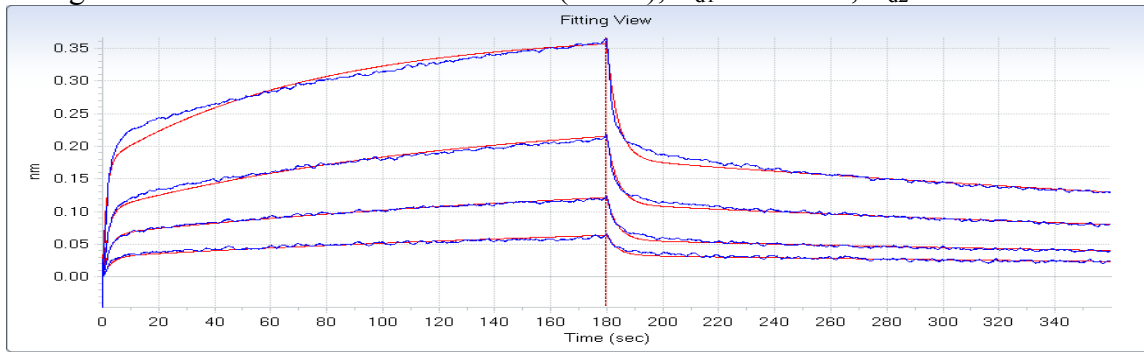

176  
177

178 5J8 IgG versus A/Solomon Islands/3/2006 (H1N1),  $K_d = 11$  nM

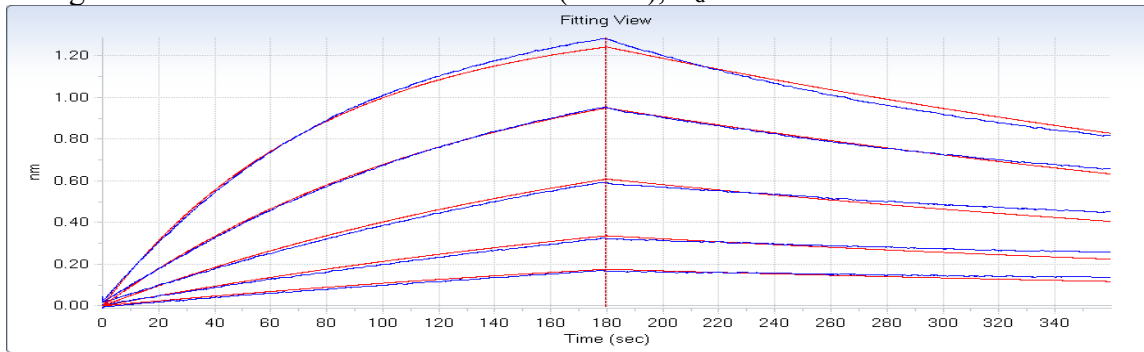

179  
180

181 5J8 IgG versus A/California/04/2009 HA2 E47G (H1N1),  $K_d = 0.15$  nM

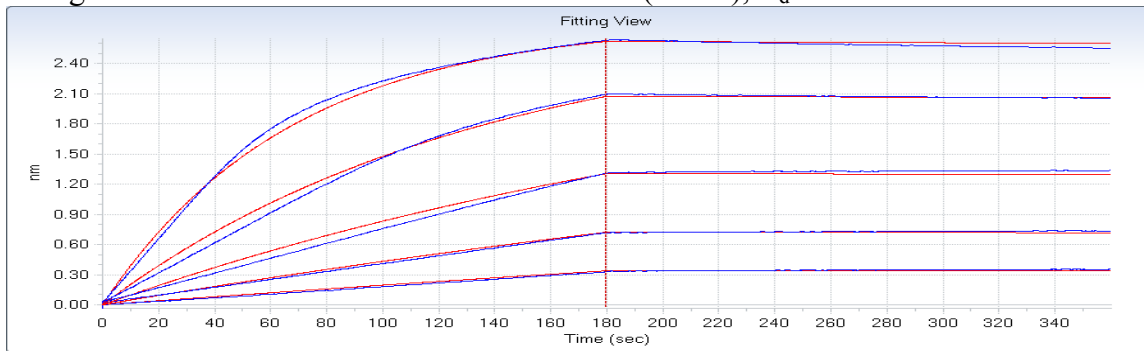

182  
183



184 CH65 Fab versus A/Singapore/6/1986 (H1N1),  $K_d = 18$  nM

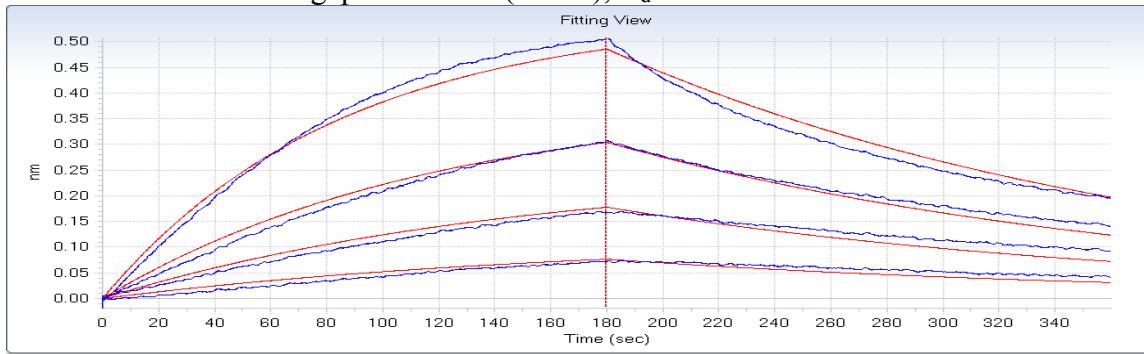

185  
186

187 CH65 Fab versus A/Texas/36/1991 (H1N1),  $K_d = 1.5$  nM

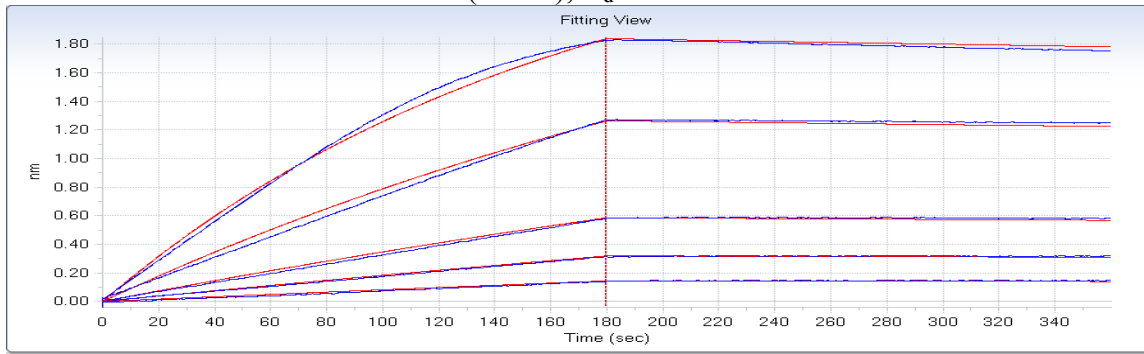

188

189 CH65 Fab versus A/Beijing/262/1995 (H1N1),  $K_d = 3.5$  nM

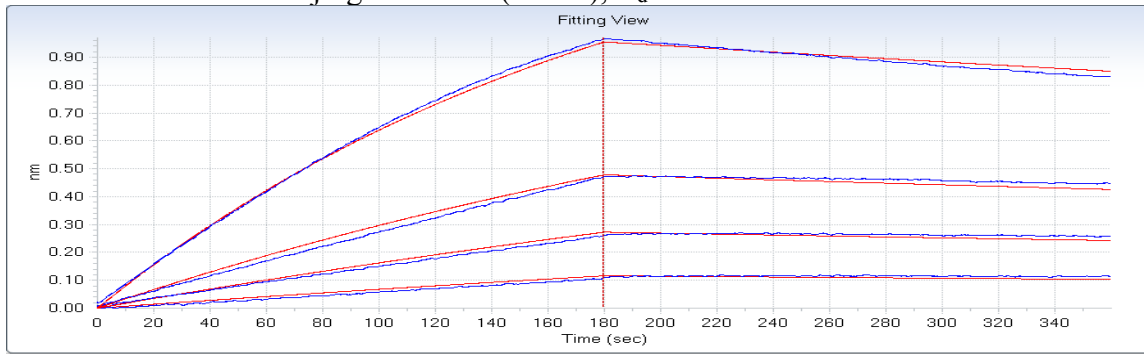

190  
191

192 CH65 Fab versus A/New Caledonia/20/1999 (H1N1),  $K_{d1} = 110$  nM,  $K_{d2} = 0.28$  nM

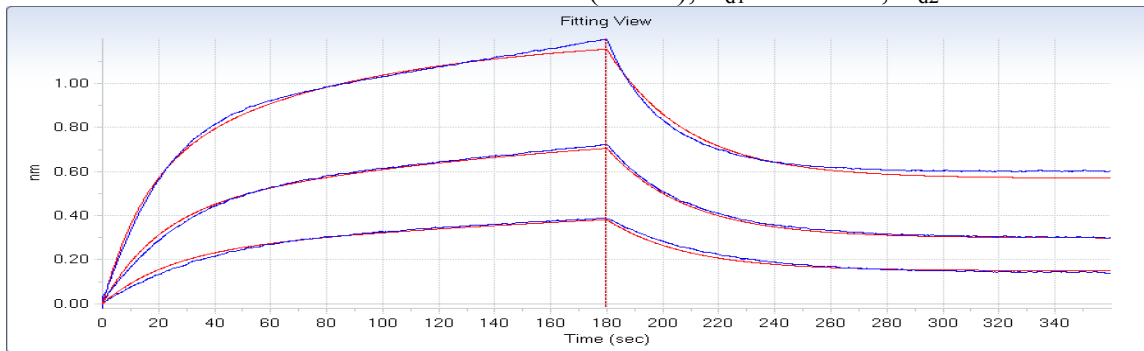

193  
194

195 CH65 Fab versus A/Solomon Islands/3/2006 (H1N1),  $K_d = 26$  nM

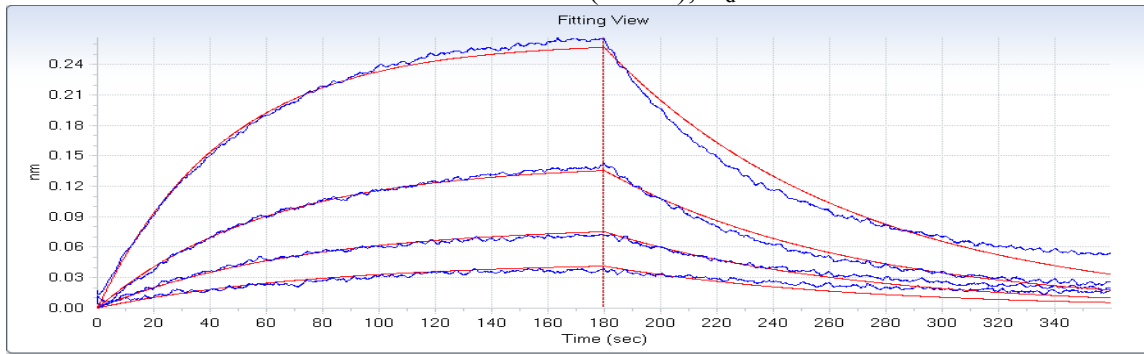

196  
197

198 CH65 IgG versus A/AA/Marton/1943 (H1N1),  $K_{d1} = 2,000$  nM,  $K_{d2} = 240$  nM

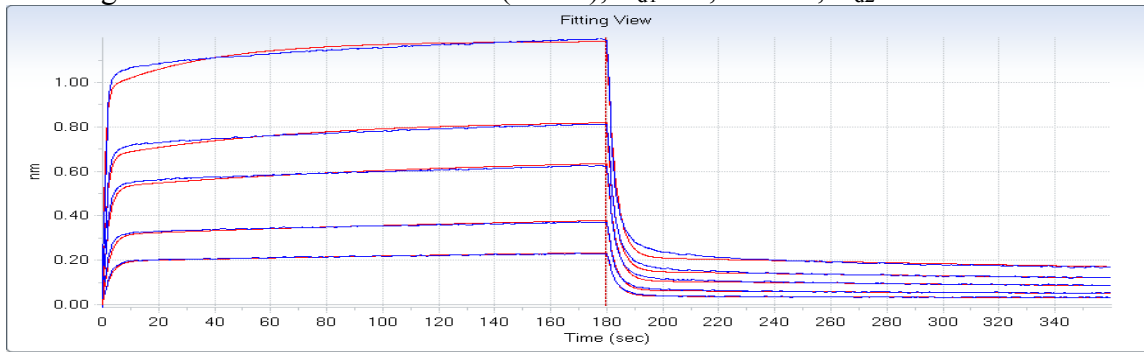

199  
200

201 CH65 IgG versus A/USSR/90/1977 (H1N1),  $K_{d1} = 230$  nM,  $K_{d2} = 23$  nM

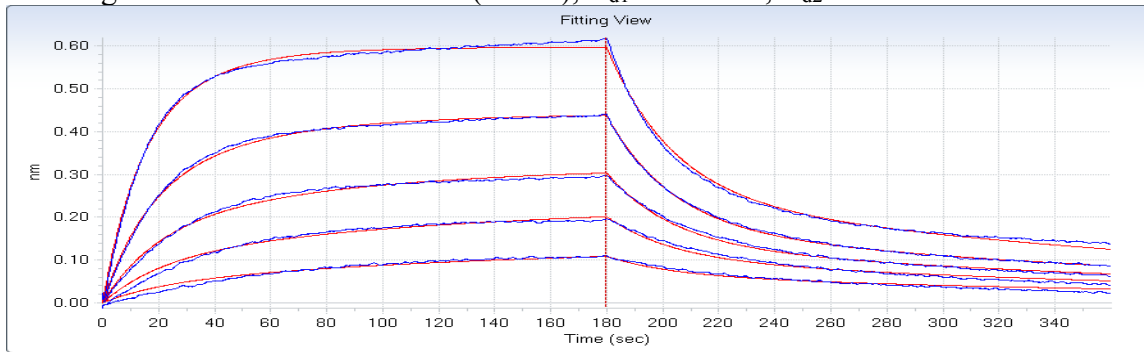

202  
203

204 CH65 IgG versus A/Singapore/6/1986 (H1N1),  $K_d = 0.13$  nM

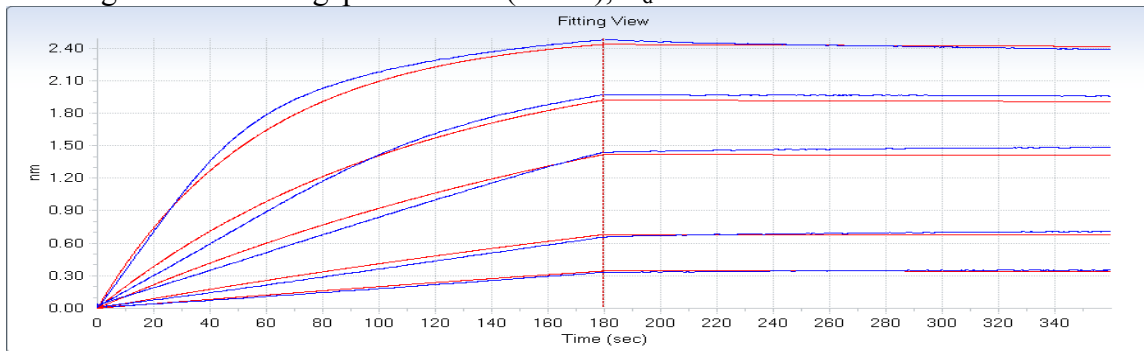

205  
206

207 CH65 IgG versus A/Texas/36/1991 (H1N1),  $K_d = 76$  pM

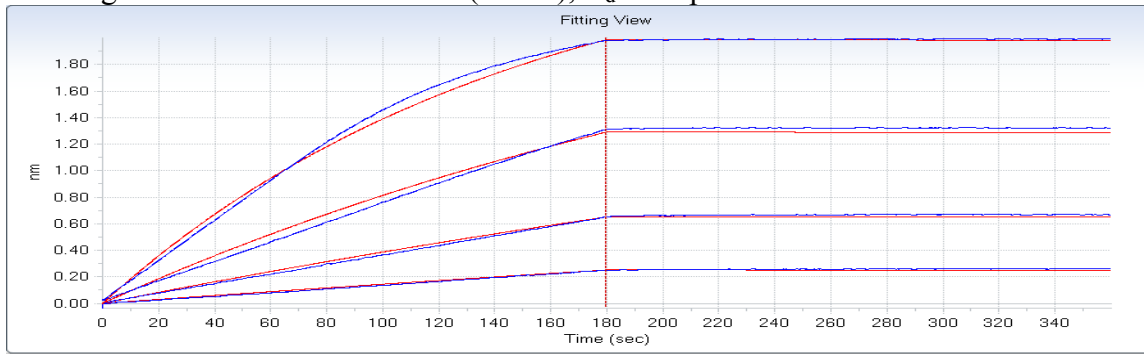

208  
209

210 CH65 IgG versus A/Beijing/262/1995 (H1N1),  $K_d = 23$  pM

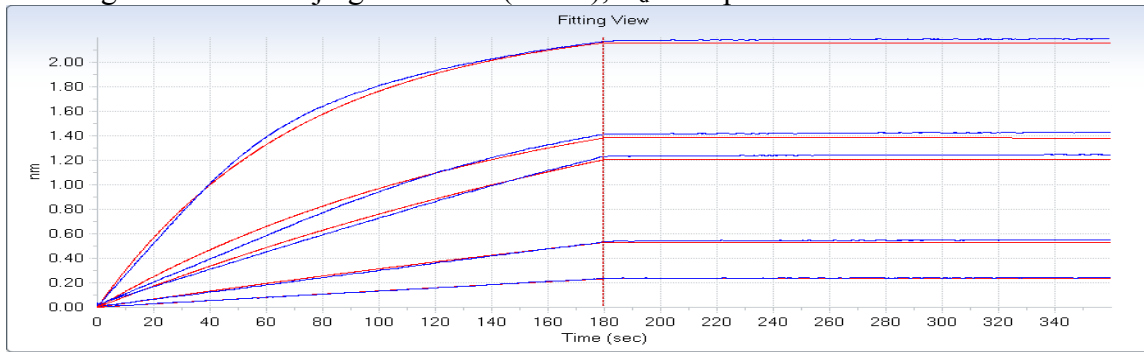

211  
212

213 CH65 IgG versus A/New Caledonia/20/1999 (H1N1),  $K_d = 0.15$  nM

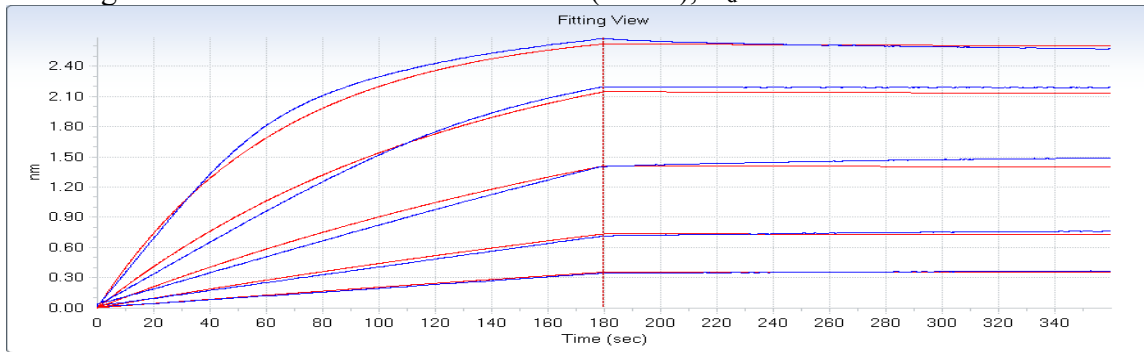

214  
215

216 CH65 IgG versus A/Solomon Islands/3/2006 (H1N1),  $K_d = 40$  pM

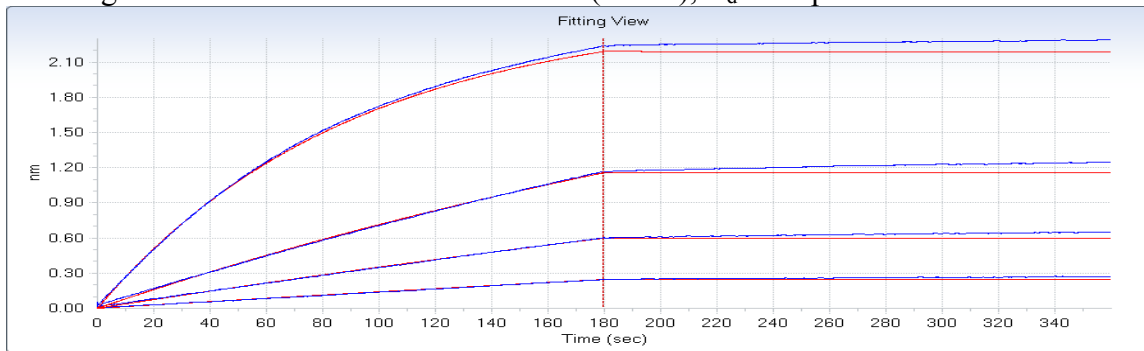

217
